# Supplementary material
Source: Elsevier journal article supplement (https://www.sciencedirect.com/science/article/pii/S0121812320300281)
Supplement: mmc1 [file S0121812320300281:mmc1.docx]

**Apéndice A.**

**Definiciones generales:** Se definió fiebre como una temperatura mayor de 37,5°C, el concepto de actividad se basó en una escala internacional conocida como SLEDAI clasificando el órgano que se está viendo comprometido. Infección se definió según el sistema que se haya visto afectado en pacientes que requirieron de manejo con antimicrobiano, sin la necesidad de tener un cultivo positivo. El desenlace que incluyera la combinación de actividad y fiebre se daba por el compromiso de órgano secundario a la enfermedad más el paciente que requirió de tratamiento con antimicrobiano observando mejoría después del tratamiento. Las definiciones utilizadas para infecciones y recaídas que afectan órganos específicos se incluyen en el Apéndice A.

**Definiciones de infecciones específicas**

- Tracto urinario: abarca cistitis aguda y pielonefritis no complicada. Esto se registró cuando la disuria, la frecuencia o la urgencia (acompañada o no por dolor suprapúbico) se asoció con piuria o hematuria en el análisis de orina (ya sea por microscopía o por tira reactiva). El análisis de orina en ausencia de cultivo de orina fue suficiente para el diagnóstico de cistitis sin complicaciones si los síntomas eran compatibles con ella.
- Neumonía adquirida en la comunidad: fue el término aplicado a la combinación de tos, producción de esputo, disnea y crepitaciones audibles en el examen físico con evidencia de apoyo de un infiltrado demostrable en la radiografía de tórax o tomografía computarizada (TC). Los datos microbiológicos registrados (disponibles) consistieron en coloración de Gram de esputo, cultivo de sangre o esputo.
- Gastroenteritis aguda: se definió como una disminución de la inconsistencia y un aumento en la frecuencia de los movimientos intestinales (≥ 3 deposiciones por día) que se resolvió en menos de 14 días. Los síntomas de acompañamiento pueden incluir náuseas, vómitos o calambres abdominales. No se necesitaron cultivos de heces para el diagnóstico.
- Bronquitis aguda: se consideró en presencia de tos que dura más de cinco días, pero menos de tres semanas, lo que podría incluir producción de esputo o disnea sin evidencia de neumonía u otras complicaciones relacionadas (empiema, derrame pleural) observadas en radiografía de tórax o TC.
- Absceso cutáneo: se definió como una colección de pus dentro de la dermis y los tejidos más profundos de la piel.
- Celulitis: se definieron como eritema cutáneo, edema y calor que implican la dermis más profunda y la grasa subcutánea (celulitis) o la dermis superior y los linfáticos superficiales (erisipela). Los hemocultivos, las aspiraciones con aguja o las biopsias de punción no fueron necesarios para el diagnóstico, pero los datos se recuperaron cuando estaban disponibles.
- Infección de la vía aérea superior: el resfriado común y la rinosinusitis aguda fueron considerados bajo el término infecciones respiratorias del tracto superior. Los síntomas incluyen la combinación de malestar, dolor de garganta, tos, dolor de cabeza, congestión nasal, ronquera, sensibilidad en los senos, secreción nasal, malestar maxilar o dolor facial. La sinusitis se confirmó mediante radiografías simples o TC
- Absceso abdominal: se consideró una colección de material purulento confirmada por ultrasonido, TC o resonancia magnética (RM), expresada clínicamente con síntomas de disfunción gastrointestinal tales como anorexia, náuseas, vómitos, hinchazón o constipación.
- Meningitis: fue considerado cuando la cefalea estaba acompañada de náuseas, fotofobia o alteraciones cognitivas asociada a aumento de leucocitos y niveles de proteína en el líquido cefalorraquídeo (LCR). La designación de meningitis aséptica se realizó cuando los cultivos de LCR para bacterias y hongos permanecieron estériles.
- Infección relacionada con catéter: se consideró cuando un paciente con necesidad previa de un catéter permanente presentaba síntomas de sepsis o complicaciones como endocarditis o tromboflebitis supurativa y hemocultivos positivos en ausencia de otras fuentes identificables de infección

**Definiciones de recaídas específicas de órganos**

- Mucocutáneo: Rash malar, úlceras orales, lesiones discoideas, paniculitis, alopecia, infartos digitales y vasculitis cutánea
- Articular: artralgias con artritis
- Hematológico: disminución del número de plaquetas < 100.000/mm3, Coombs positivo activo, anemia hemolítica con nivel de hemoglobina < 10 mg/dl o adenitis lúpica
- Serositis: pleuritis, pericarditis y derrame pericárdico o pleural
- Renal: A) un aumento en los niveles de proteína de orina de 24 horas > 1 g si el valor anterior era de < 0,5 g, > 3 g si el valor de la línea de base era > 0,5 - 1 g o más de dos veces el valor de referencia si el valor de referencia fue > 1 g. B) un aumento del nivel de creatinina sérica de > 25% acompañado de proteinuria, hematuria. C) aumento de la hematuria en 2 en comparación con el último valor, asociado con el nuevo valor glóbulos rojos o un aumento en las concentraciones de proteína urinaria de 24 horas
- Muscular: miositis inflamatoria
- Cardiopulmonar: neumonitis lúpica, miocarditis, enfermedad pulmonar intersticial, hipertensión pulmonar, hemorragia alveolar.
- Gastrointestinal: Hepatitis autoinmune relacionada con lupus, enteropatía, colitis y pancreatitis secundaria a vasculitis de LES.
- Neuropsiquiátrico: uno de los 19 síndromes de lupus neuropsiquiátricos
